# Supplementary material for: The effects of a two-week neuromuscular intervention on biopsychosocial variables in people with patellofemoral pain: an observational study
Source: PubMed Central journal article supplement (PMC10225691; doi:10.3389/fspor.2023.1087061), 2023-05-15

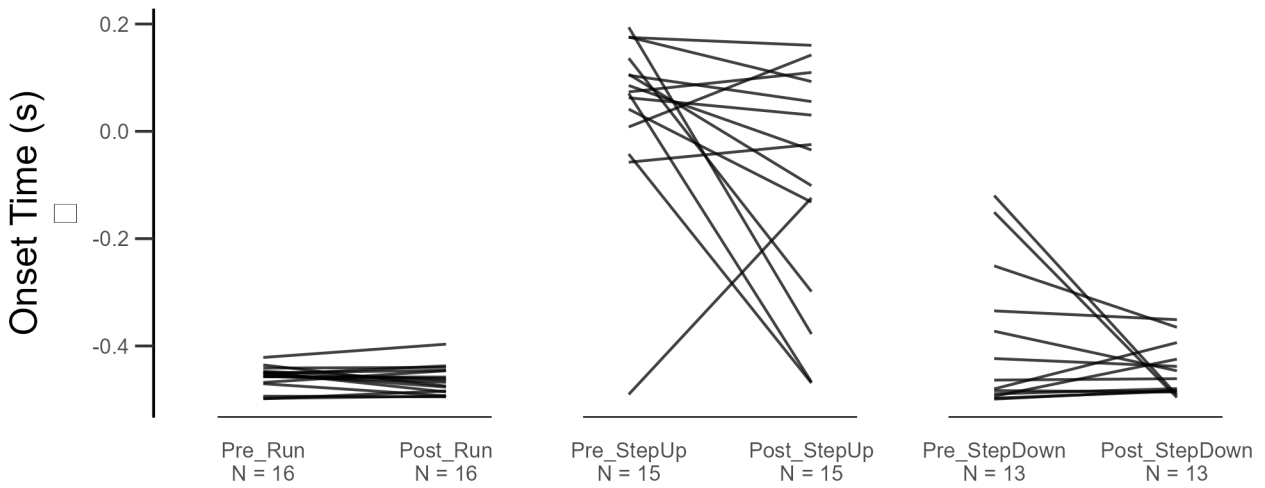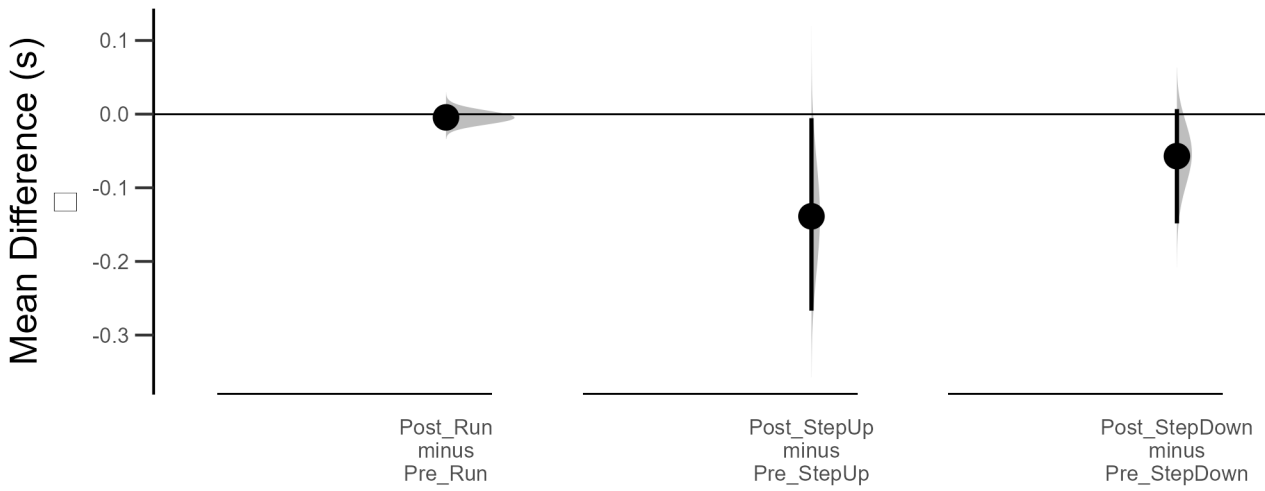

Supplement: Image3.pdf [file Image3.pdf]
